# Supplementary material for: Biodegradation of Fumonisins by the Consecutive Action of a Fusion Enzyme
Source: MDPI journal article supplement (doi:10.3390/toxins14040266), 2022-04-09
Supplement: s1 [file s1]

## Article

# Biodegradation of Fumonisin by the Consecutive Action of a Fusion Enzyme

Kailin Li, Song Yu, Dianshen Yu, Huikang Lin, Na Liu and Aibo Wu

**Table S1.** Primers sequences used for RT-qPCR amplification.

| Gene name               | Primers sequences                                                                             |
|-------------------------|-----------------------------------------------------------------------------------------------|
| Complementation primers |                                                                                               |
| fumD                    | F: GCGAATTCATGCATCATCACCATCACCATAAAGAACACCAATGTAGA<br>R: GTCTCGTACCATTGGCCTTAGATGGTTGACATGCTT |
| fumI                    | F: AAGCATGTCAACCATCTAAGGCCAATGGTACGAGAC<br>R: GCCCTAGGTCAAGCACCAGCAAGTTGCATC                  |
| M13                     | F: CGCCAGGGTTTTCCCAGTCACGAC<br>R: GAGCGGATAACAATTTCACACAGG                                    |
| pPIC9K                  | F: TGGTGGGAATACTGCTGATAG<br>R: CCCAACTTGAAGTGAAGGAAC'                                         |
| qRT-PCR primers         |                                                                                               |
| β-Actin                 | F: CCTGGCACCCAGCACAAT<br>R: GGGCCGGACTCGTCATAC                                                |
| Caspase-3               | F: GCTGAGCTGCCTGTAAGTTGAGAG<br>R: CATGGCTCTGCCTTCATGGAACAG                                    |
| Sod2                    | F: AACCTCACATCAACGCGCAGATC<br>R: CTCCTGGTACTTCTCCTCGGTGAC                                     |
| GRP78                   | F: TTGTTCTTGTTGGTGGCTCGACTC<br>R: GACAGCAGCACCATACGCTACAG                                     |
| ATF4                    | F: GTTCCTGCTGCCTGGTGTCTTG<br>R: GCACGCCACCTTCTCAATTCATTC                                      |
